# Supplementary material
Source: Springer Nature journal article supplement (https://www.springermedizin.de/resource/supplementary/13058_2004_946_MOESM5_ESM.pdf/9705688)

**(a)**

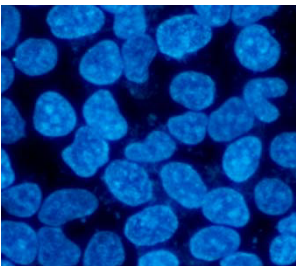

**(b)**

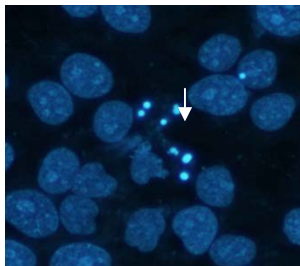

**(c)**

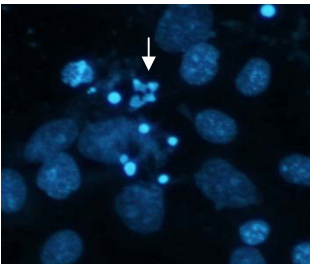

**(d)**

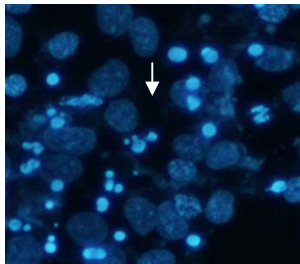

Supplement: MOESM5 [file 9705688]
